# Supplementary material
Source: publisher figshare collection journal article supplement (https://acs.figshare.com/ndownloader/files/3720097)
Supplement: Supplementary file 1 [file 3720097]

## Supporting Information

for

### Tube-graft-Sheet Nano-Objects Created by A Stepwise Self-Assembly of Polymer-Polyoxometalate Hybrids

Jing Tang, Xue-Ying Li, Han Wu, Li-Jun Ren, Yu-Qi Zhang, Hai-Xia Yao, Min-Biao Hu, and Wei Wang\*

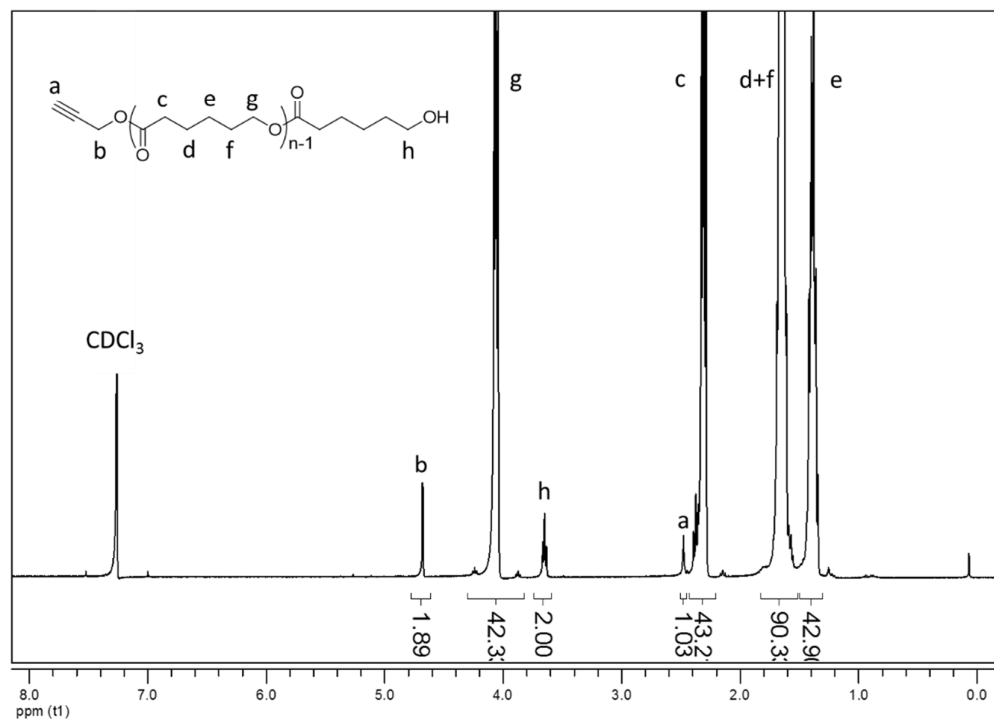

**Figure S1.**  $^1\text{H}$  NMR spectrum of PCL<sub>19</sub>-OH.

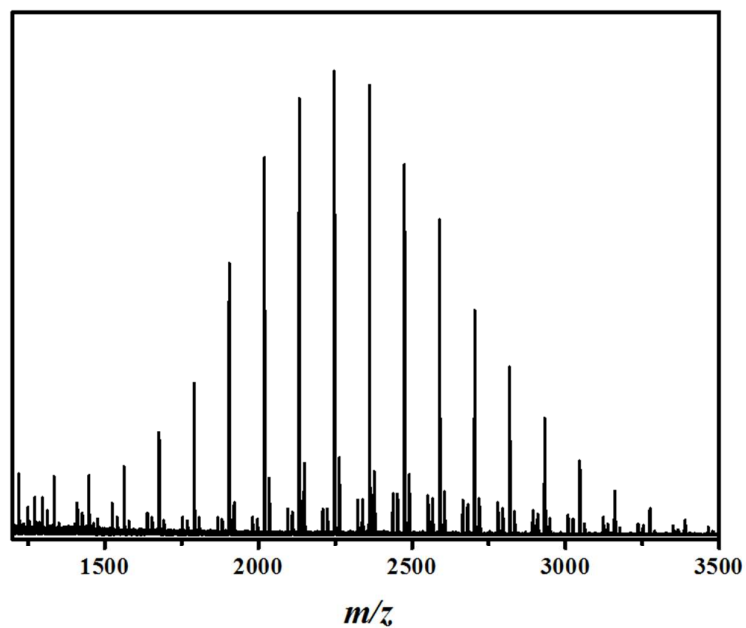

**Figure S2.** MALDI-TOF mass spectra of PCL<sub>19</sub>. The calculated monoisotopic mass for the 19-mer of PCL<sub>19</sub> is 2247.0 Da ( $[M_{19} \cdot Na]^+$ ) and the observed  $m/z$  equals 2247.3.

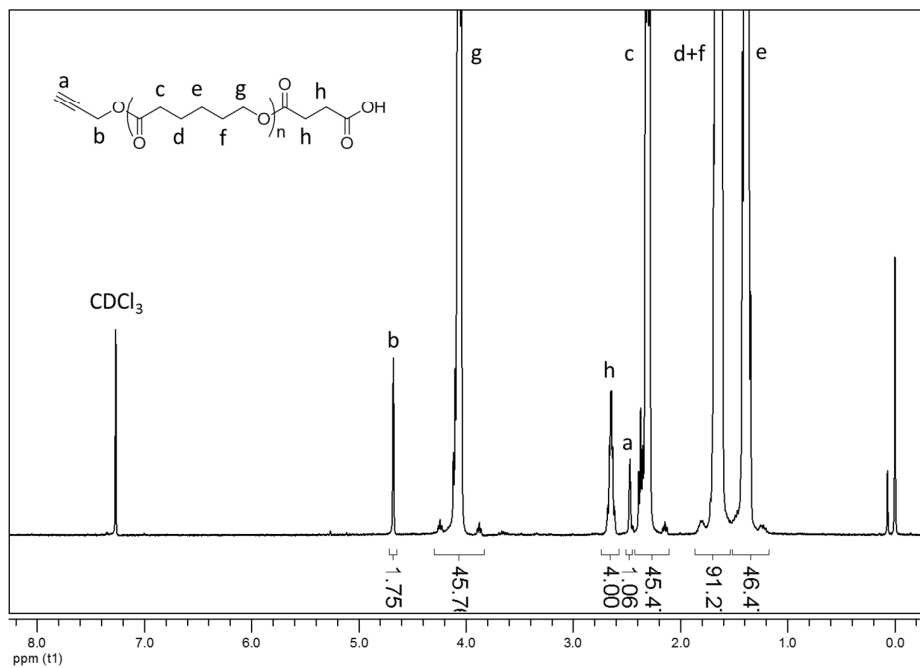

**Figure S3.** <sup>1</sup>H NMR spectrum of PCL<sub>19</sub>-COOH.

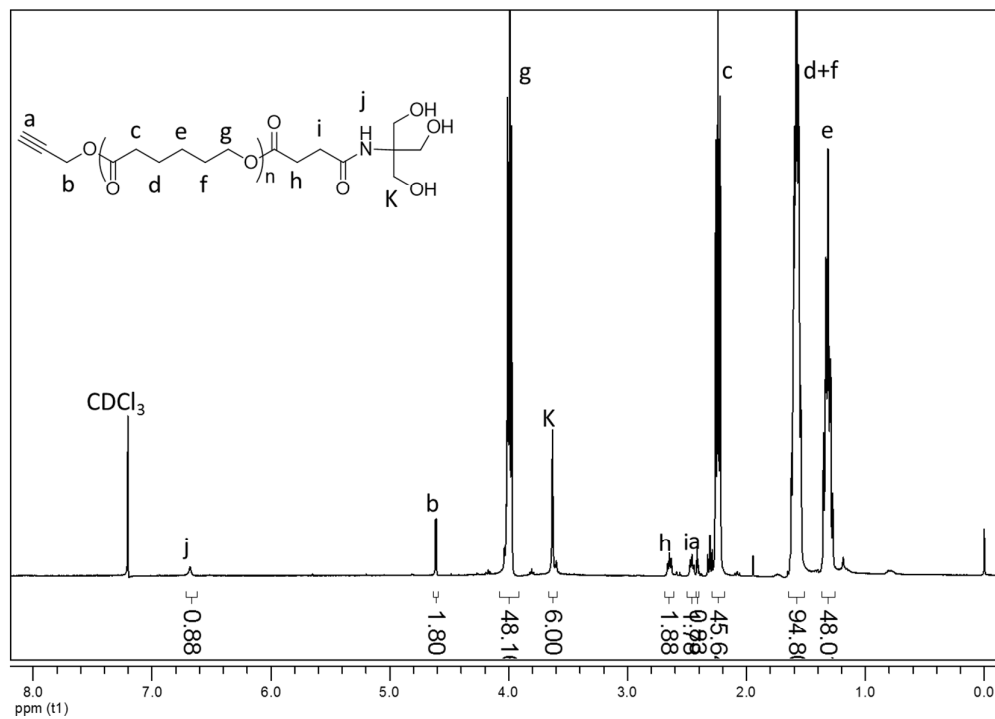

**Figure S4.** <sup>1</sup>H NMR spectrum of PCL<sub>19</sub>-Tris.

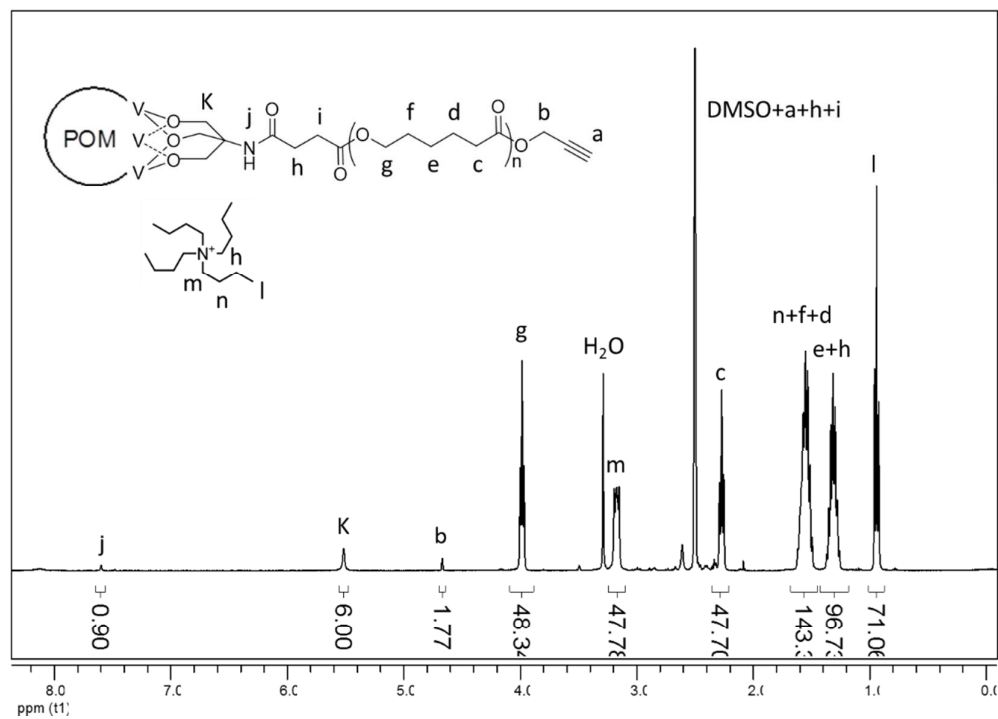

**Figure S5.** <sup>1</sup>H NMR spectrum of PCL<sub>19</sub>-POM.

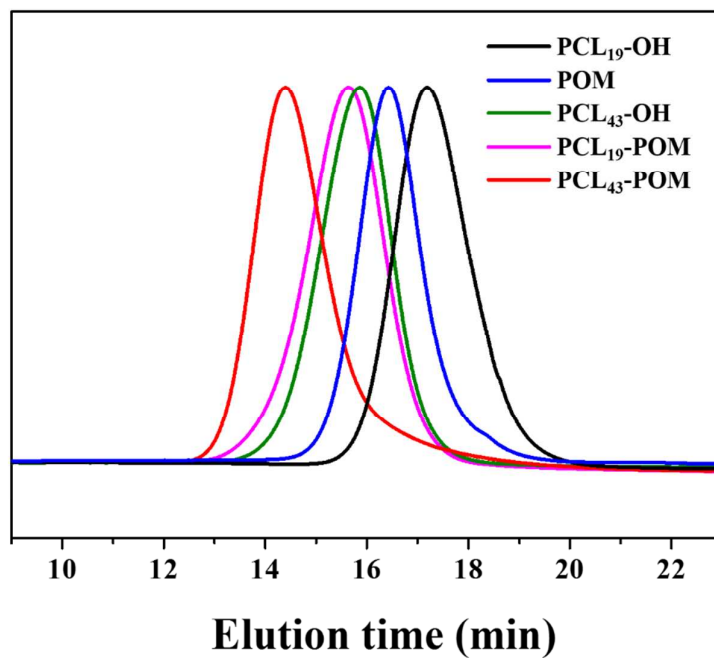

**Figure S6.** SEC chromatograms of the POM, PCL<sub>19</sub>-OH, PCL<sub>43</sub>-OH, PCL<sub>19</sub>-POM and PCL<sub>43</sub>-POM measured in DMF.

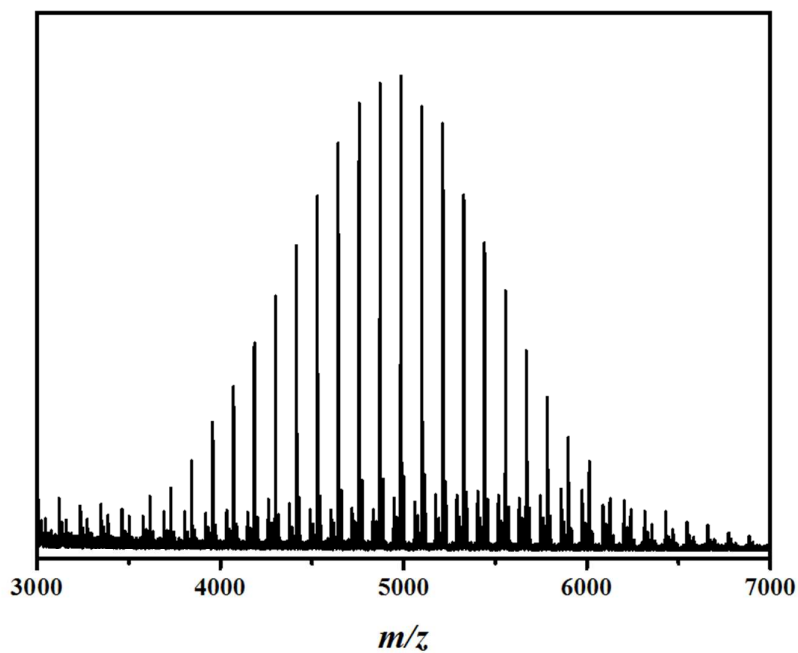

**Figure S7.** MALDI-TOF mass spectra of PCL<sub>43</sub>. The calculated monoisotopic mass for the 43-mer of PCL<sub>43</sub> is 4985.4 Da ( $[M_{43} \cdot Na]^+$ ) and the observed  $m/z$  equals 4985.7.

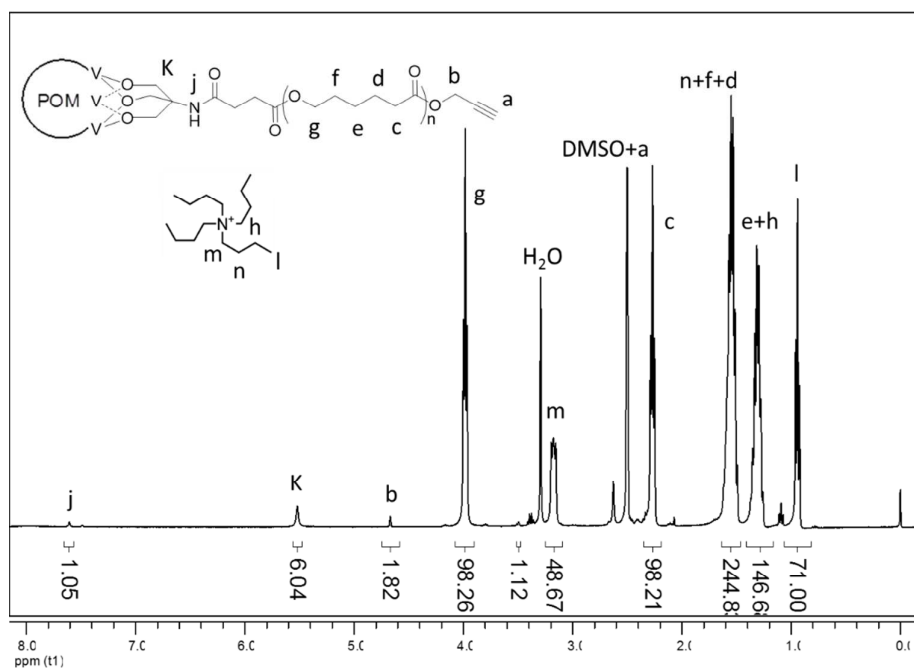

**Figure S8.**  $^1\text{H}$  NMR spectrum of  $\text{PCL}_{43}\text{-POM}$ .

**Table S1.** Summary of molecular weights and molecular weight distributions ( $\text{PDI} = \bar{M}_w / \bar{M}_n$ ) of POM-PCL hybrid.

| Sample                       | $\bar{M}_n$ kg/mol | $\bar{M}_w$ kg/mol | $\bar{M}_z$ kg/mol | PDI  |
|------------------------------|--------------------|--------------------|--------------------|------|
| POM                          | 4.9                | 5.6                | ---                | ---  |
| $\text{PCL}_{19}\text{-OH}$  | 2.0                | 2.3                | 3.5                | 1.15 |
| $\text{PCL}_{19}\text{-POM}$ | 7.5                | 8.6                | 10.1               | 1.14 |
| $\text{PCL}_{43}\text{-OH}$  | 5.1                | 6.1                | 6.5                | 1.19 |
| $\text{PCL}_{43}\text{-POM}$ | 11.0               | 12.5               | 14.5               | 1.14 |

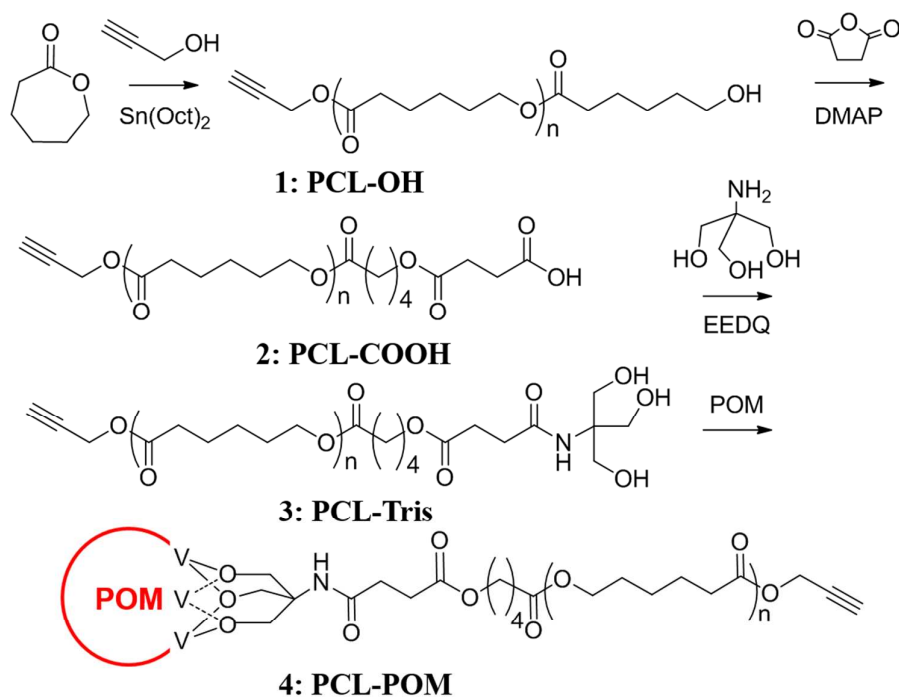

**Scheme S1.** Synthetic route of the PCL-POM hybrids.

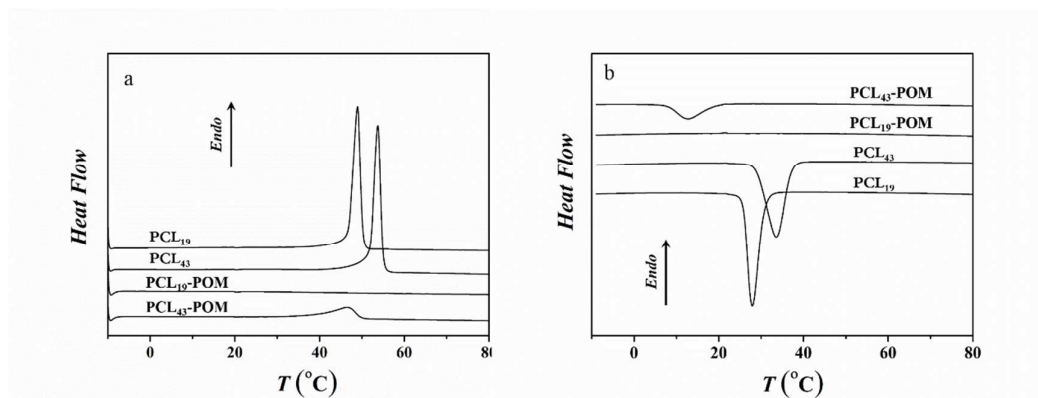

**Figure S9.** DSC thermographs of (a) second heating flow and (b) cooling flow for PCL<sub>19</sub>, PCL<sub>43</sub>, PCL<sub>19</sub>-POM, and PCL<sub>43</sub>-POM.

**Table S2.** DSC data of PCL<sub>19</sub>, PCL<sub>43</sub>, PCL<sub>19</sub>-POM, and PCL<sub>43</sub>-POM.

| Sample                 | $T_m$ (°C) | $T_c$ (°C) | $\Delta H$ (J/g) | $f_{\text{PCL}}^a$ |
|------------------------|------------|------------|------------------|--------------------|
| PCL <sub>19</sub>      | 49.0       | 27.9       | 93.5             | 0.69               |
| PCL <sub>43</sub>      | 53.7       | 33.6       | 92.8             | 0.69               |
| PCL <sub>19</sub> -POM | ---        | ---        | ---              | ---                |
| PCL <sub>43</sub> -POM | 46.5       | 12.7       | 27.3             | 0.42               |

<sup>a</sup>  $f_{\text{PCL}}$  is the degree of crystallinity of PCL.  $f_{\text{PCL}} = \Delta H_c / \Delta H_{100}$ ,  $H_c = \Delta H_{\text{DSC}} / \text{PCL}\%$ ,  $\Delta H_{100}$  is the heat of crystallization of 100% crystalline PCL.

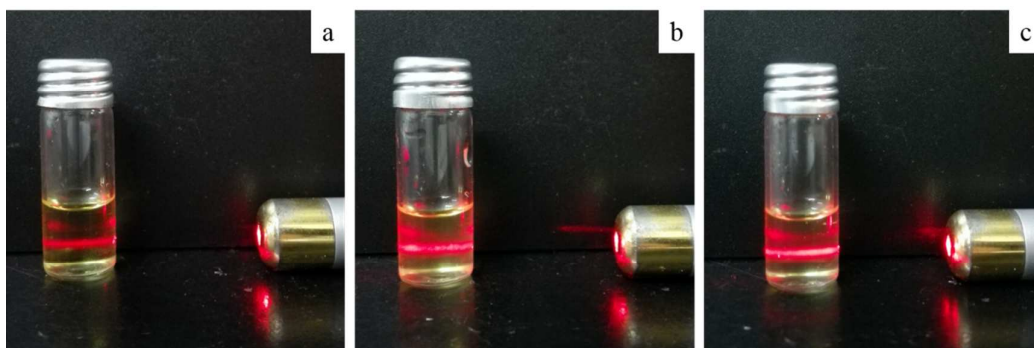

**Fig. S10.** Tyndall scattering of the solutions. (a) Solution of PCL<sub>43</sub>-POM at  $r = 5:1$  v/v of DMF/water. (b) Solution of PCL<sub>19</sub>-POM at  $r = 2:1$  v/v. (b) Solution prepared following a procedure: Dropping the DMF solution of PCL<sub>19</sub>-POM into a suspension of the PCL<sub>43</sub>-POM nanosheets at  $r = 5:1$  v/v, and then immediately adding water into the suspension to change the ratio to  $r = 2:1$  v/v.

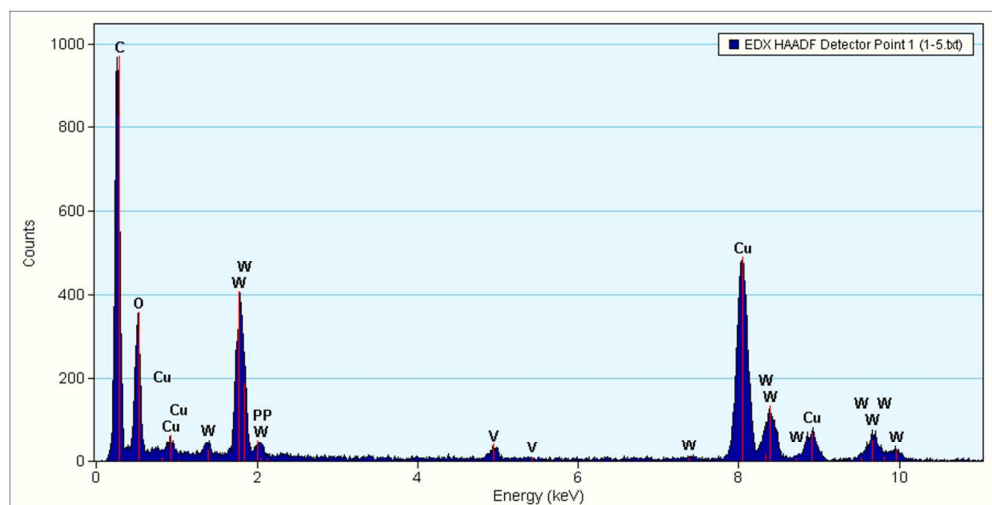

**Figure S11.** EDX spectrum taken on the nanosheets.

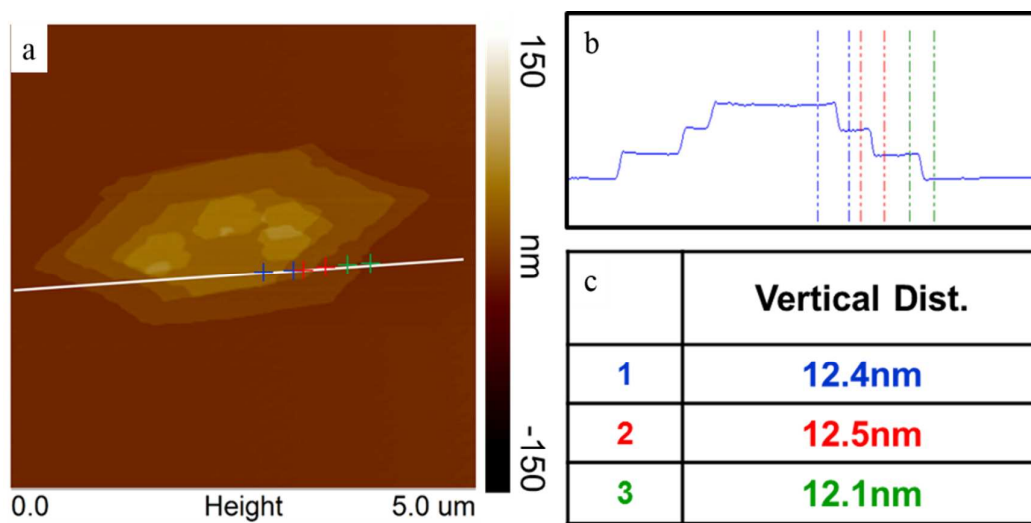

**Figure S12.** (a) AFM height images showing the PCL<sub>43</sub>-POM nanosheets. (b) Height profiles of the nanosheets. (c) Measured vertical distance (or height) of the nanosheets.



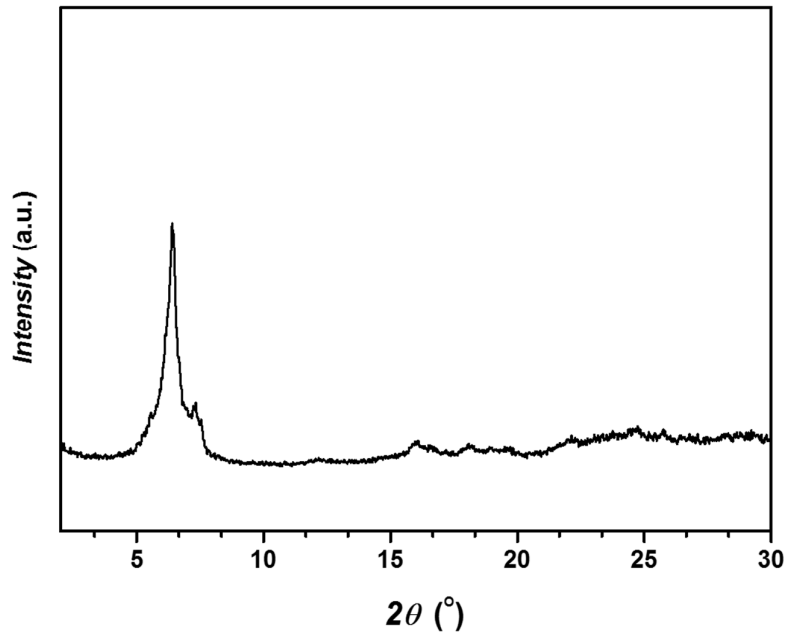

**Figure S13.** XRD pattern of the crystalline sample of the pure POM cluster.

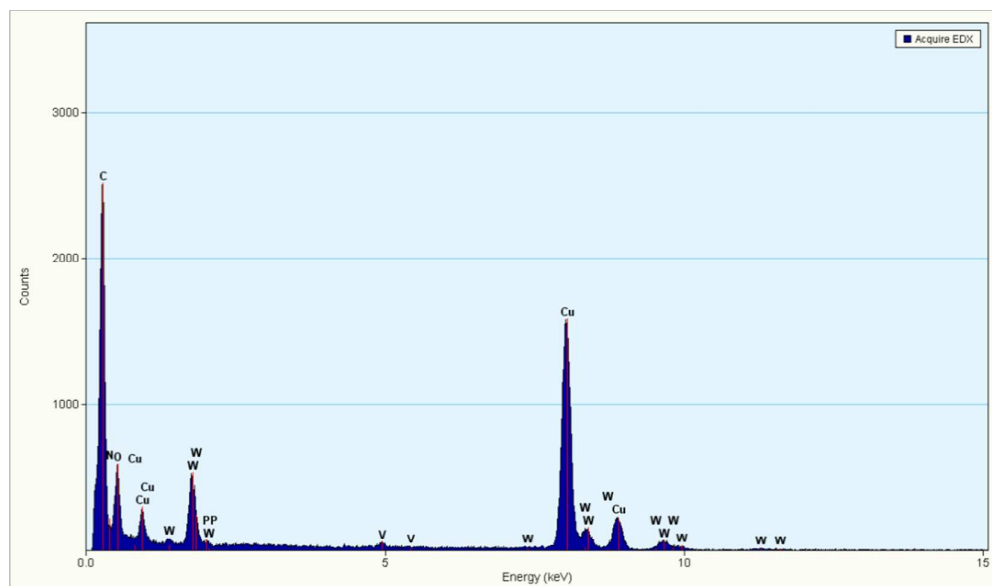

**Figure S14.** EDX spectrum taken on the nanotubes.

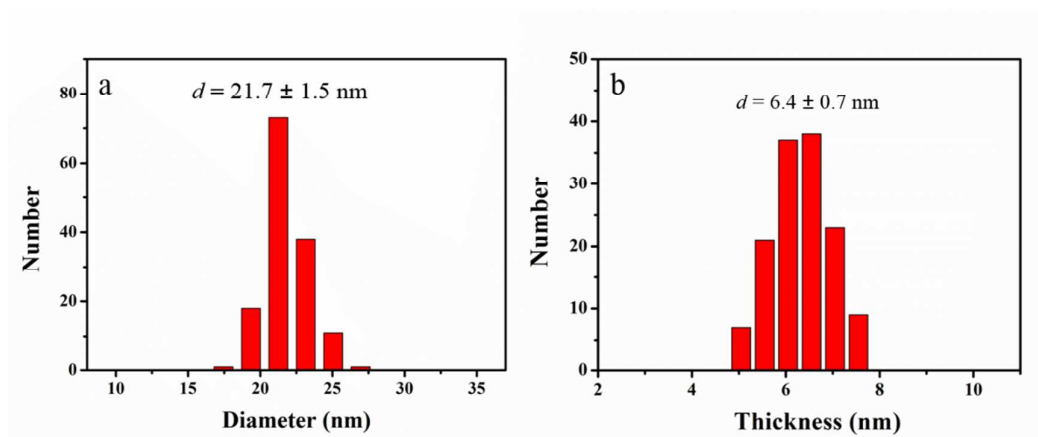

**Figure S15.** (a) The outside diameter distribution of nanotubes. (b) The outside diameter distribution of nanotubes.

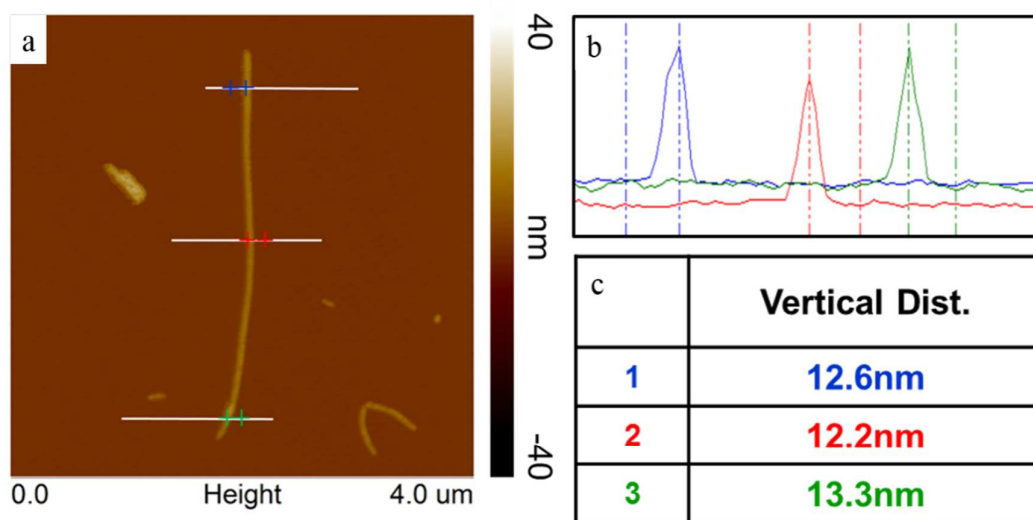

**Figure S16.** (a) AFM height images showing the PCL<sub>19</sub>-POM nanotubes. (b) Height profiles of the nanotubes. (c) Measured vertical distance (or height) of the nanotubes.

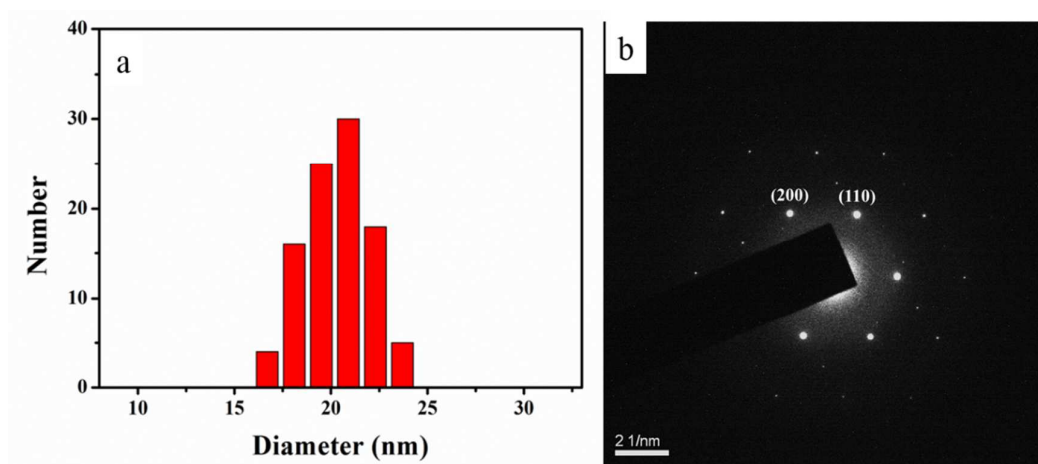

**Figure S17.** (a) The outside diameter distribution of grown nanotubes. (b) The ED pattern of the darker zone.

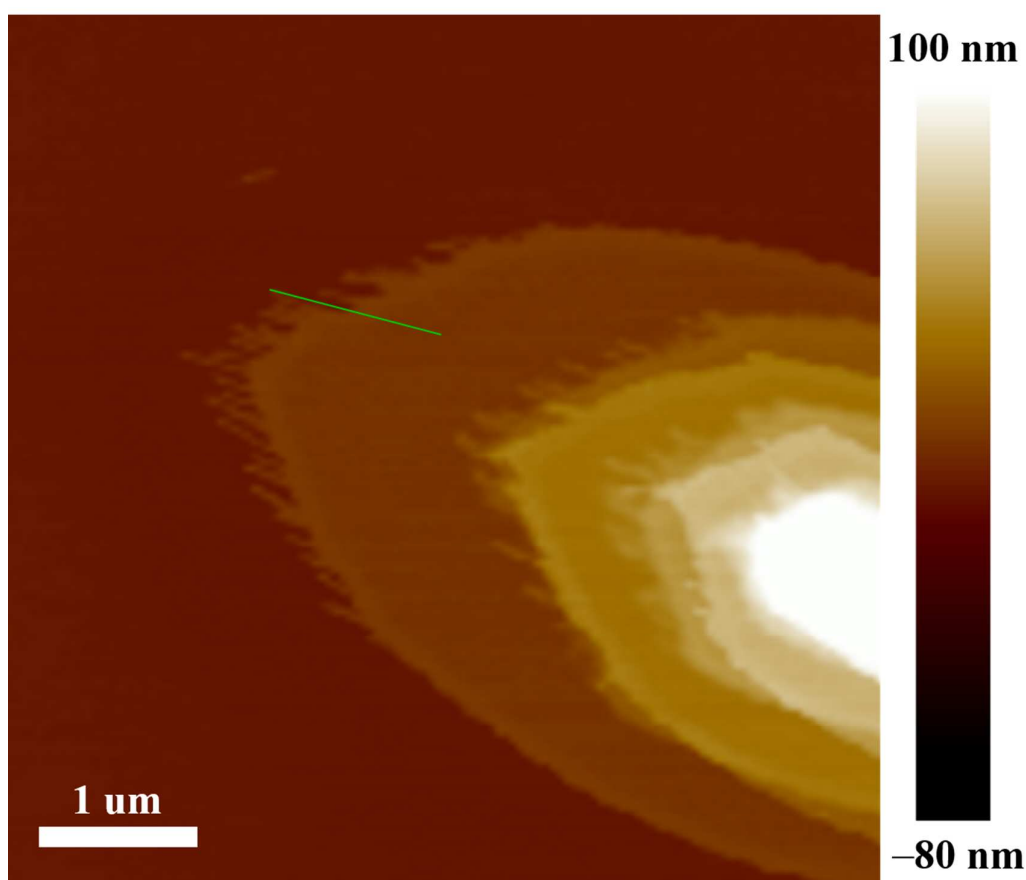

**Figure S18.** AFM height image showing the complex tube-graft-sheet nano-objects. The height profile in Figure 4c corresponds to the green line.
